# Supplementary material for: 「人の手」洗浄に近づいた自動食器洗浄機 (特集1 身近な衛生管理基礎シリーズ(2)食器の衛生と洗浄)
Source: Royal Society of Chemistry journal article supplement (doi:10.1039/c6sm01677d), 2005-04-01
Supplement: c6sm01677d1.pdf [file c6sm01677d1.pdf]

## Supporting material

### Convective mass transport dominates surfactant adsorption in a microfluidic Y-junction

Kelly Muijlwijk\*, Wenqian Huang, Jan-Eise Vuist, Claire Berton-Carabin and Karin Schroën

Wageningen University, Food Process Engineering group, Bornse Weilanden 9, 6708 WG, Wageningen, The Netherlands

e-mail: [kelly.muijlwijk@wur.nl](mailto:kelly.muijlwijk@wur.nl) [wenqian.huang@wur.nl](mailto:wenqian.huang@wur.nl) [jan-eise.vuist@wur.nl](mailto:jan-eise.vuist@wur.nl) [claire.carabin-berton@wur.nl](mailto:claire.carabin-berton@wur.nl) [karin.schroen@wur.nl](mailto:karin.schroen@wur.nl)

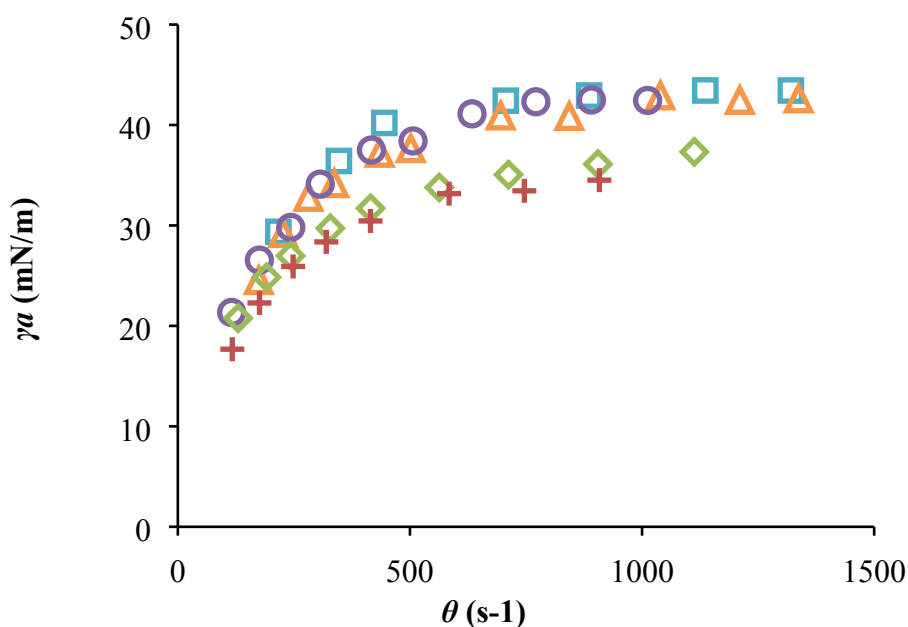

Figure S1. Acting interfacial tension at the aqueous phase-hexadecane interface for 0.1 wt. % SDS solutions in water (□), 10 wt. % sucrose (Δ), 20 wt. % sucrose (○), 20 wt. % glycerol (◇), and 30 wt. % glycerol (+), as a function of the expansion rate.

Table S1. Flow rates, expansion rate and acting interfacial tension of data used for Figure 1 and Figure S1.

| Continuous phase          | $\varphi_c$ ( $\mu\text{L/h}$ ) | $v_c$ ( $m/s$ ) | $\varphi_d$ ( $\mu\text{L/h}$ ) | $\theta$ ( $s^{-1}$ ) | $\gamma_a$ ( $mN/m$ ) | $\gamma_n$ (-) |
|---------------------------|---------------------------------|-----------------|---------------------------------|-----------------------|-----------------------|----------------|
| 0.1 % SDS in water        | 91                              | 0.2             | 0.9                             | 217                   | 29                    | 0.5            |
| 0.1 % SDS in water        | 91                              | 0.3             | 1.4                             | 347                   | 36                    | 0.8            |
| 0.1 % SDS in water        | 91                              | 0.3             | 2.0                             | 445                   | 40                    | 0.9            |
| 0.1 % SDS in water        | 91                              | 0.3             | 2.8                             | 706                   | 42                    | 1.0            |
| 0.1 % SDS in water        | 89                              | 0.2             | 3.8                             | 886                   | 43                    | 1.0            |
| 0.1 % SDS in water        | 88                              | 0.2             | 4.7                             | 1136                  | 43                    | 1.0            |
| 0.1 % SDS in water        | 90                              | 0.2             | 5.4                             | 1321                  | 43                    | 1.0            |
| 0.1 % SDS in 10% sucrose  | 135                             | 0.4             | 0.5                             | 174                   | 25                    | 0.4            |
| 0.1 % SDS in 10% sucrose  | 131                             | 0.4             | 1.0                             | 281                   | 33                    | 0.7            |
| 0.1 % SDS in 10% sucrose  | 134                             | 0.4             | 1.6                             | 435                   | 37                    | 0.8            |
| 0.1 % SDS in 10% sucrose  | 135                             | 0.4             | 2.6                             | 695                   | 41                    | 0.9            |
| 0.1 % SDS in 10% sucrose  | 131                             | 0.4             | 4.1                             | 1039                  | 43                    | 1.0            |
| 0.1 % SDS in 10% sucrose  | 134                             | 0.4             | 5.6                             | 1337                  | 43                    | 1.0            |
| 0.1 % SDS in 20% sucrose  | 113                             | 0.3             | 0.3                             | 116                   | 21                    | 0.3            |
| 0.1 % SDS in 20% sucrose  | 111                             | 0.3             | 0.7                             | 243                   | 30                    | 0.6            |
| 0.1 % SDS in 20% sucrose  | 110                             | 0.3             | 1.5                             | 417                   | 38                    | 0.8            |
| 0.1 % SDS in 20% sucrose  | 107                             | 0.3             | 2.5                             | 634                   | 41                    | 1.0            |
| 0.1 % SDS in 20% sucrose  | 103                             | 0.3             | 3.7                             | 891                   | 42                    | 1.0            |
| 0.1 % SDS in 20% glycerol | 128                             | 0.4             | 0.4                             | 130                   | 21                    | 0.3            |
| 0.1 % SDS in 20% glycerol | 128                             | 0.4             | 0.8                             | 243                   | 27                    | 0.6            |
| 0.1 % SDS in 20% glycerol | 133                             | 0.4             | 1.5                             | 415                   | 32                    | 0.8            |
| 0.1 % SDS in 20% glycerol | 138                             | 0.4             | 2.6                             | 712                   | 35                    | 0.9            |
| 0.1 % SDS in 20% glycerol | 134                             | 0.4             | 4.4                             | 1113                  | 37                    | 1.0            |
| 0.1 % SDS in 20% glycerol | 139                             | 0.4             | 6.1                             | 1507                  | 38                    | 1.0            |
| 0.1 % SDS in 30% glycerol | 113                             | 0.3             | 0.3                             | 117                   | 18                    | 0.2            |
| 0.1 % SDS in 30% glycerol | 111                             | 0.3             | 0.7                             | 248                   | 26                    | 0.6            |
| 0.1 % SDS in 30% glycerol | 110                             | 0.3             | 1.4                             | 415                   | 30                    | 0.8            |
| 0.1 % SDS in 30% glycerol | 110                             | 0.3             | 2.2                             | 584                   | 33                    | 0.0            |
| 0.1 % SDS in 30% glycerol | 109                             | 0.3             | 3.5                             | 908                   | 35                    | 0.9            |

Table S2. Flow rates, expansion rate and acting interfacial tension of data used for Figure 2.

| Continuous phase   | Dispersed phase | $\varphi_c$ ( $\mu\text{L}/\text{h}$ ) | $v_c$ (m/s) | $\varphi_d$ ( $\mu\text{L}/\text{h}$ ) | $\theta$ ( $\text{s}^{-1}$ ) | $\gamma_a$ (mN/m) |
|--------------------|-----------------|----------------------------------------|-------------|----------------------------------------|------------------------------|-------------------|
| 0.05% SDS in water | Hexadecane      | 116                                    | 0.3         | 6.6                                    | 1711                         | 35                |
| 0.05% SDS in water | Hexadecane      | 180                                    | 0.3         | 5.5                                    | 1913                         | 27                |
| 0.05% SDS in water | Hexadecane      | 228                                    | 0.3         | 4.5                                    | 1781                         | 21                |
| 0.05% SDS in water | Hexadecane      | 268                                    | 0.0         | 3.4                                    | 1396                         | 15                |
| 0.1% SDS in water  | Hexadecane      | 115                                    | 0.3         | 5.7                                    | 1638                         | 42                |
| 0.1% SDS in water  | Hexadecane      | 154                                    | 0.3         | 5.3                                    | 1440                         | 43                |
| 0.1% SDS in water  | Hexadecane      | 200                                    | 0.3         | 4.3                                    | 1372                         | 39                |
| 0.1% SDS in water  | Hexadecane      | 256                                    | 0.3         | 3.1                                    | 1002                         | 32                |
| 0.5% SDS in water  | Hexadecane      | 114                                    | 0.3         | 6.1                                    | 1493                         | 46                |
| 0.5% SDS in water  | Hexadecane      | 160                                    | 0.4         | 5.1                                    | 1395                         | 45                |
| 0.5% SDS in water  | Hexadecane      | 231                                    | 0.6         | 3.7                                    | 1514                         | 40                |
| 0.5% SDS in water  | Hexadecane      | 309                                    | 0.9         | 2.0                                    | 1048                         | 28                |

Table S3. Flow rates, expansion rate and acting interfacial tension of data used for Figure 3.

| Continuous phase | Dispersed phase            | $\varphi_c$ ( $\mu\text{L}/\text{h}$ ) | $v_c$ (m/s) | $\varphi_d$ ( $\mu\text{L}/\text{h}$ ) | $\theta$ ( $\text{s}^{-1}$ ) | $\gamma_a$ (mN/m) |
|------------------|----------------------------|----------------------------------------|-------------|----------------------------------------|------------------------------|-------------------|
| Water            | 0.3% Span 20 in hexadecane | 116                                    | 0.3         | 0.8                                    | 287                          | 24                |
| Water            | 0.3% Span 20 in hexadecane | 116                                    | 0.3         | 1.3                                    | 386                          | 27                |
| Water            | 0.3% Span 20 in hexadecane | 119                                    | 0.3         | 1.9                                    | 560                          | 29                |
| Water            | 0.3% Span 20 in hexadecane | 118                                    | 0.3         | 2.4                                    | 692                          | 31                |
| Water            | 0.3% Span 20 in hexadecane | 112                                    | 0.3         | 2.9                                    | 809                          | 33                |
| Water            | 0.3% Span 20 in hexadecane | 116                                    | 0.3         | 3.4                                    | 842                          | 34                |
| Water            | 0.3% Span 20 in hexadecane | 117                                    | 0.3         | 4.0                                    | 1044                         | 36                |
| Water            | 0.3% Span 20 in hexadecane | 224                                    | 0.6         | 2.2                                    | 806                          | 25                |
| Water            | 0.3% Span 20 in hexadecane | 241                                    | 0.7         | 2.5                                    | 968                          | 26                |
| Water            | 0.3% Span 20 in hexadecane | 235                                    | 0.6         | 3.2                                    | 1165                         | 28                |
| Water            | 0.3% Span 20 in hexadecane | 244                                    | 0.7         | 3.7                                    | 1500                         | 28                |
| Water            | 0.3% Span 20 in hexadecane | 245                                    | 0.7         | 4.9                                    | 1896                         | 31                |
| Water            | 0.3% Span 20 in hexadecane | 241                                    | 0.7         | 6.1                                    | 2095                         | 34                |
| Water            | 0.3% Span 20 in hexadecane | 239                                    | 0.7         | 7.1                                    | 2231                         | 35                |
| Water            | 0.5% Span 20 in hexadecane | 139                                    | 0.4         | 0.5                                    | 328                          | 10                |
| Water            | 0.5% Span 20 in hexadecane | 112                                    | 0.3         | 1.5                                    | 608                          | 14                |
| Water            | 0.5% Span 20 in hexadecane | 106                                    | 0.3         | 2.2                                    | 824                          | 17                |
| Water            | 0.5% Span 20 in hexadecane | 107                                    | 0.3         | 2.8                                    | 967                          | 20                |
| Water            | 0.5% Span 20 in hexadecane | 202                                    | 0.4         | 1.0                                    | 558                          | 8                 |
| Water            | 0.5% Span 20 in hexadecane | 208                                    | 0.5         | 1.5                                    | 787                          | 10                |
| Water            | 0.5% Span 20 in hexadecane | 204                                    | 0.5         | 2.1                                    | 1041                         | 12                |
| Water            | 0.5% Span 20 in hexadecane | 210                                    | 0.5         | 2.7                                    | 1301                         | 13                |
| Water            | 0.5% Span 20 in hexadecane | 211                                    | 0.6         | 3.3                                    | 1449                         | 15                |
| Water            | 0.5% Span 20 in hexadecane | 213                                    | 0.6         | 4.0                                    | 1803                         | 17                |
